# Supplementary material
Source: PubMed Central journal article supplement (PMC2688966)
Supplement: 0902659106_0902659106SI.pdf [file 0902659106_0902659106SI.pdf]

# Supporting Information

Guma et al. 10.1073/pnas.0902659106

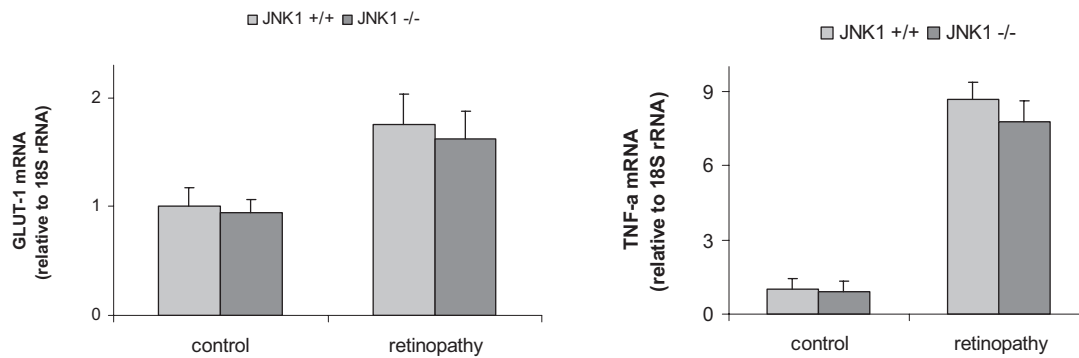

**Fig. S1.** JNK1 is not involved in regulation of hypoxia-inducible genes other than VEGF or inflammatory cytokines. RNA was extracted from retinas of normoxic or oxygen-induced retinopathy (OIR)-challenged mice at postnatal day 15 (P15), and mRNA expression was analyzed by quantitative (Q)-RT-PCR. Results are expressed as means  $\pm$  SEM ( $n = 4$  per genotype). GLUT-1 is a typical hypoxia-inducible gene, whereas TNF- $\alpha$  is an inflammatory cytokine.

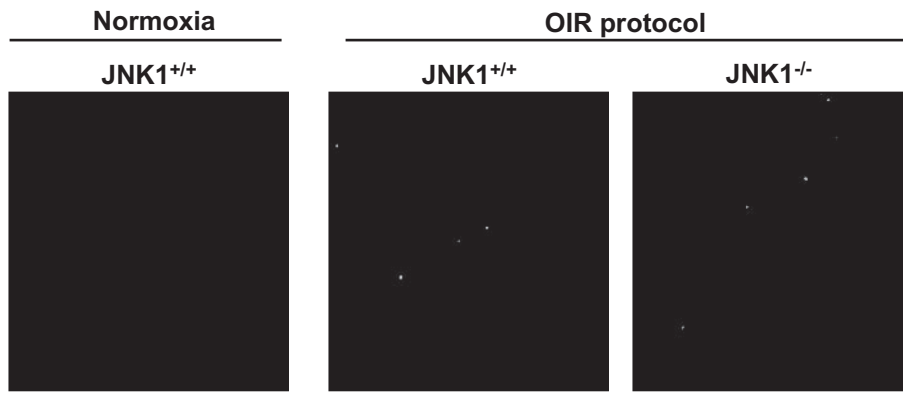

**Fig. S2.** JNK1 is not involved in retinal apoptosis. *Jnk1*<sup>-/-</sup> and *wild-type* (WT) retinas were examined by an in situ TUNEL assay at P14 of the OIR protocol for the presence of cells undergoing apoptosis.



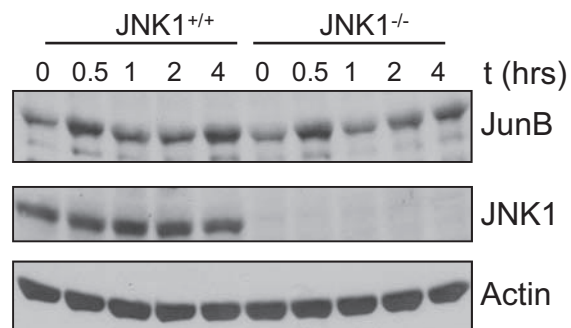

**Fig. S4.** JNK1 does not control JunB expression. *Jnk1*<sup>+/+</sup> and *Jnk1*<sup>-/-</sup> BMDM were cultured under normoxia (Po<sub>2</sub> = 21%) or hypoxia (Po<sub>2</sub> = 0.5%) for different times. Cell lysates were obtained, and protein expression was analyzed by immunoblotting.

**PBS**

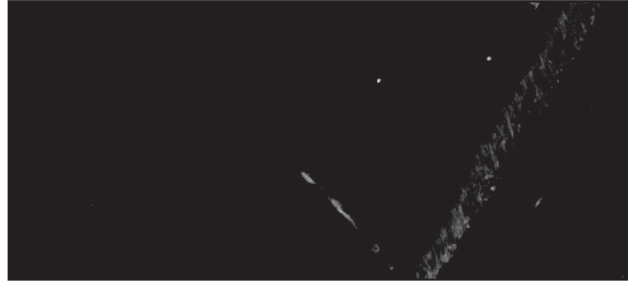

**D-JNKi**

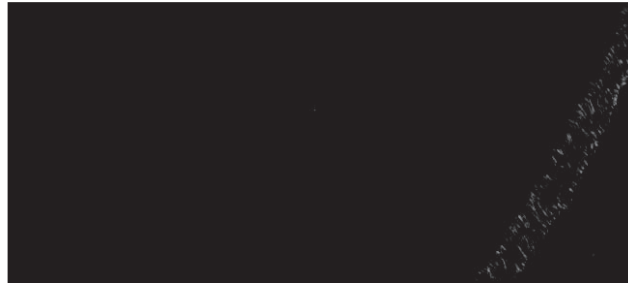

**spleen**

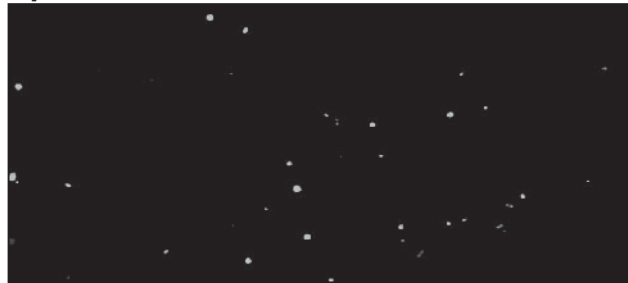

**Fig. S5.** The D-JNKi peptide does not induce retinal apoptosis. Retinas from PBS or D-JNKi-treated eyes (injected at P18 and assessed at P19) do not show increased apoptosis. Spleen tissue served as a control. Apoptotic cells were visualized by an in situ TUNEL assay.

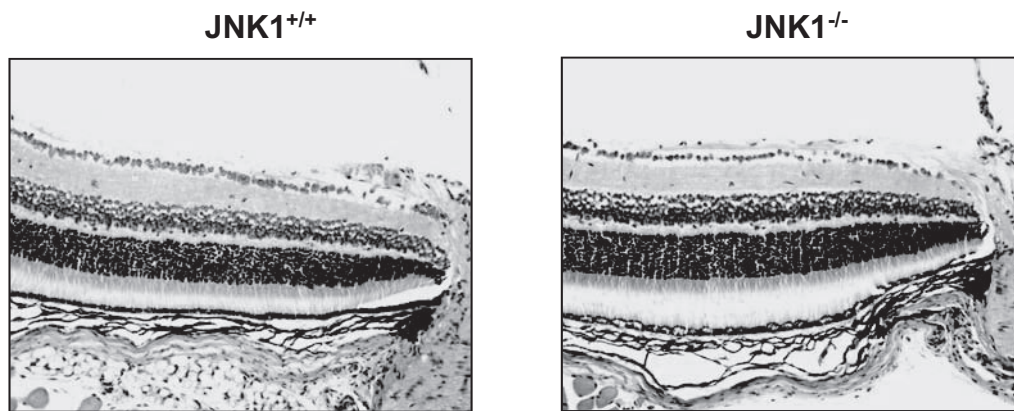

**Fig. S6.** *Jnk1*<sup>-/-</sup> mice do not show any retinal morphological abnormalities. Retinas from *Jnk1*<sup>-/-</sup> mice show normal histology in retinal cross-sections stained with hematoxylin and eosin (P18) under normoxic conditions.

**Table S1. Evaluation of retinal parameters as indicators of acute treatment toxicity**

| Parameters                             | JNK1 <sup>+/+</sup> | JNK1 <sup>-/-</sup> | PBS-treated | D-JNKi-treated |
|----------------------------------------|---------------------|---------------------|-------------|----------------|
| Ganglion cells* <sup>†</sup>           | 30.3 ± 4.1          | 31.6 ± 2.8          | 31.2 ± 5.8  | 32.9 ± 5.8     |
| Width whole retina <sup>†</sup>        | 2.9 ± 0.41          | 2.7 ± 0.32          | 2.7 ± 0.32  | 2.9 ± 0.33     |
| Width inner nuclear layer <sup>†</sup> | 0.53 ± 0.1          | 0.47 ± 0.11         | 0.49 ± 0.1  | 0.49 ± 0.1     |
| Width outer nuclear layer <sup>†</sup> | 0.69 ± 0.13         | 0.7 ± 0.12          | 0.69 ± 0.13 | 0.67 ± 0.11    |

\*Number of ganglion cells.

<sup>†</sup>Values are means ± SD (*n* > 10).
